# Supplementary material
Source: PubMed Central journal article supplement (PMC2799861)
Supplement: 0910708106_0910708106SI.pdf [file 0910708106_0910708106SI.pdf]

# Supporting Information

Bieniossek et al. 10.1073/pnas.0910708106

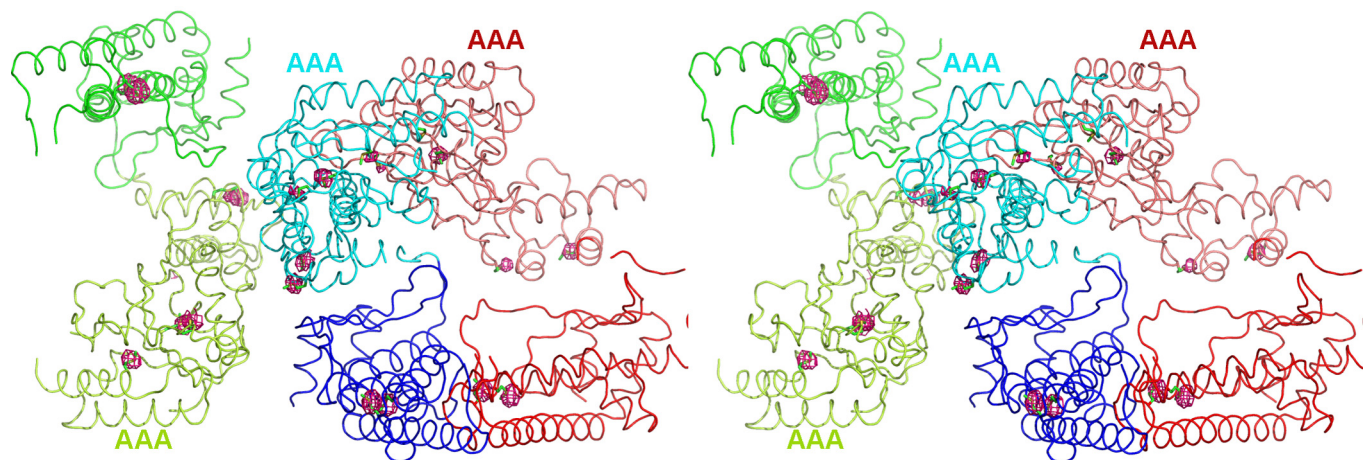

**Fig. S1.** Stereoview of the imaginary Fourier map revealing selenium positions in protease and AAA domains. The  $C\alpha$  traces of 3 independent monomers in the asymmetric unit are shown in lime/green, cyan/blue, and salmon/red for AAA/protease domains, respectively. The imaginary part of the Fourier map calculated with coefficients  $(F^+ - F^-) \exp[i(\varphi - \pi/2)]$  is shown as pink mesh contoured at 6 sigma, this is above the first noise peak (4.8 sigma). The highest signal originates from the two methionines in each protease domain.

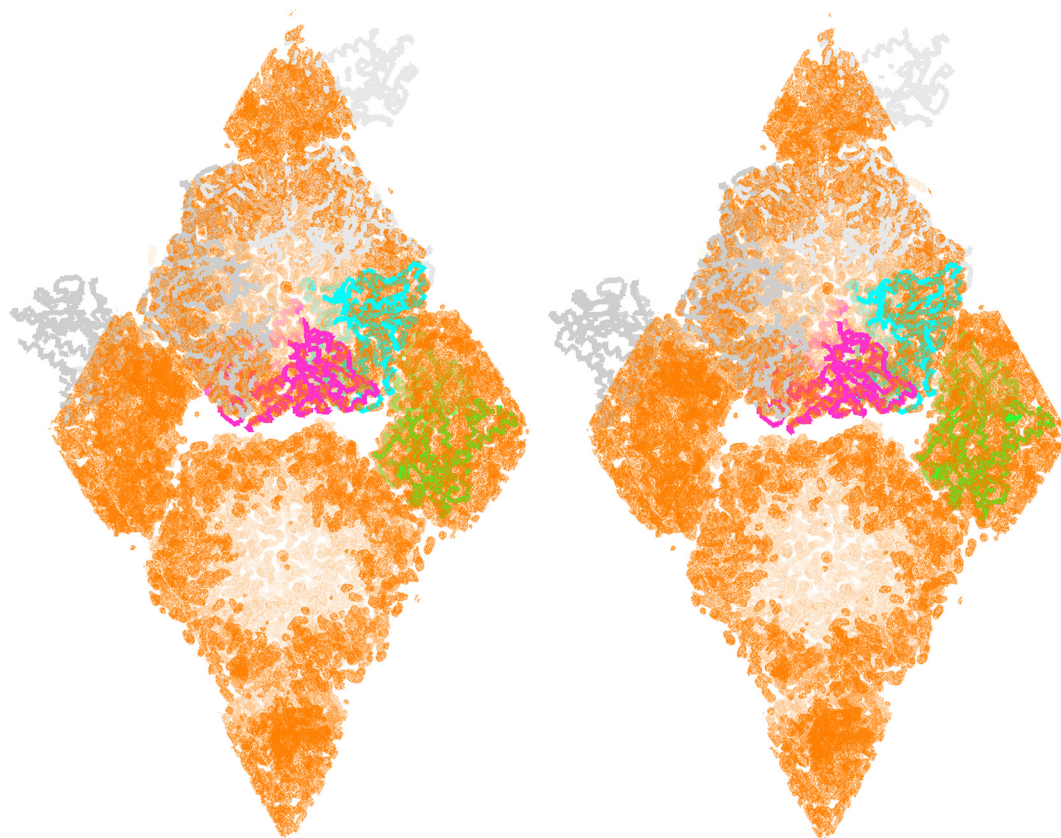

**Fig. S2.** Stereoview of the experimental electron density map. The 3 independent monomers are colored in magenta, green, and cyan, symmetry-mates in gray. The view is along the crystallographic 6-fold down onto the AAA domains of the magenta/cyan hexamer. The solvent-modified electron density map (orange) is contoured at 1 sigma.

|    |        |              |       |   |         |    |      |      |       |   |      |     |     |     |   |      |   |   |   |   |   |   |   |   |   |   |   |   |   |   |   |   |   |   |   |   |   |   |   |   |   |   |   |   |   |   |   |   |   |   |   |
|----|--------|--------------|-------|---|---------|----|------|------|-------|---|------|-----|-----|-----|---|------|---|---|---|---|---|---|---|---|---|---|---|---|---|---|---|---|---|---|---|---|---|---|---|---|---|---|---|---|---|---|---|---|---|---|---|
|    |        |              | 370   |   | 380     |    | 390  |      | 400   |   | 410  |     | 420 |     |   |      |   |   |   |   |   |   |   |   |   |   |   |   |   |   |   |   |   |   |   |   |   |   |   |   |   |   |   |   |   |   |   |   |   |   |   |
| tr | Q72IK4 | Q72IK4_THET2 | NEAAL | L | AAREGRR | KI | TMKD | LEE  | AADRV | M | GPAK | KS  | L   | VLS | P | RDRR | I | T | A | Y | H | E | A | G | H | A | L | A |   |   |   |   |   |   |   |   |   |   |   |   |   |   |   |   |   |   |   |   |   |   |   |
| tr | Q9WZ49 | Q9WZ49_THEMA | NEAAL | L | AAREGRD | KI | TMKD | FEE  | AIDRV | I | GP   | ARK | S   | K   | L | I    | S | P | K | E | K | R | I | I | A | Y | H | E | A | G | H | A | V | V |   |   |   |   |   |   |   |   |   |   |   |   |   |   |   |   |   |
| sp | P37476 | FTSH_BACSU   | NEAAL | V | AARQNKK | KI | D    | A    | R     | D | I    | E   | A   | T   | D | R    | V | I | A | G | P | A | K | S | R | V | I | S | K | E | R | N | I | V | A | Y | H | E | G | G | H | T | V | I |   |   |   |   |   |   |   |
| sp | P0AAI3 | FTSH_ECOLI   | NEAAL | F | AARGNKR | V  | V    | S    | M     | V | E    | F   | E   | K   | A | K    | D | K | I | M | G | A | E | R | S | M | V | M | T | E | A | Q | K | E | S | T | A | Y | H | E | A | G | H | A | I | I |   |   |   |   |   |
| tr | A1CF64 | A1CF64_ASPCL | NEAAL | V | AARENAD | S  | V    | TMKH | F     | E | Q    | A   | I   | E   | R | V    | V | G | L | E | K | S | L | V | L | S | P | E | E | K | T | V | A | Y | H | E | A | G | H | A | I | C |   |   |   |   |   |   |   |   |   |
| tr | Q6PGJ7 | Q6PGJ7_MOUSE | NEAAL | I | AARHLSP | S  | V    | Q    | E     | R | H    | F   | E   | Q   | A | I    | E | R | V | I | G | L | E | K | T | Q | V | L | Q | P | S | E | K | T | T | V | A | Y | H | E | A | G | H | A | V | V |   |   |   |   |   |
| tr | Q8W585 | Q8W585_ARATH | NEAAL | I | LAGR    | R  | G    | K    | T     | A | I    | S   | S   | K   | E | I    | D | S | I | D | R | I | V | A | G | M | E | G | . | T | V | M | T | D | G | K | S | K | S | L | V | A | Y | H | E | V | G | H | A | I | C |
| tr | Q58F00 | Q58F00_HUMAN | NEAAL | H | AAREGHT | S  | V    | H    | T     | L | N    | F   | E   | Y   | A | V    | E | R | V | L | A | G | T | A | K | S | K | I | L | S | K | E | E | Q | K | V | V | A | F | H | E | S | G | H | A | L | V |   |   |   |   |

Fig. S3. Conservation of the linker glycine. Alignment of FtsH homologs from *T. thermophilus*, *T. maritima*, *Bacillus subtilis*, *E. coli*, *A. clavatus*, *Mus musculus*, *Arabidopsis Thaliana*, and *Homo sapiens*. The conserved glycine (G399 in *T. thermophilus*) is marked by a blue dot.

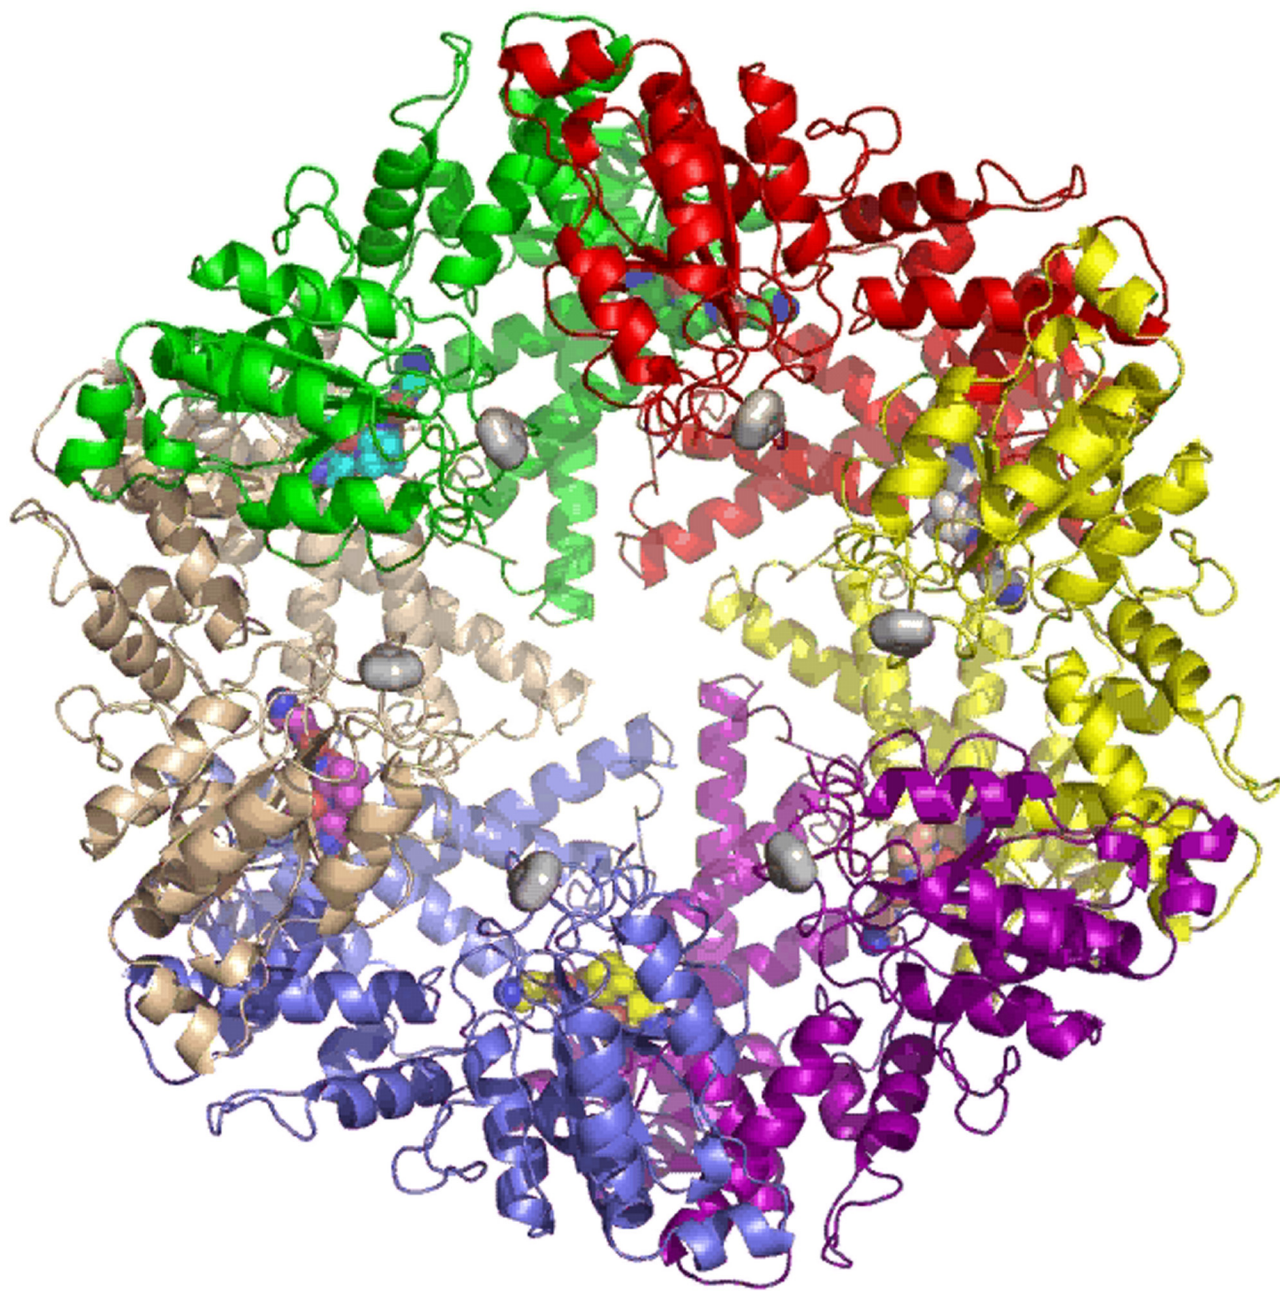

**Movie S1.** Morphing between Apo- and ADP-Bound State. The hexamer is colored according to subunits, pore residues are shown as gray sticks. TAPI and ADP are shown in space-filling representation at the endpoints. This visualization shows the trajectories of the aromatic side-chains but is unrealistic as all 6 subunits undergo simultaneously the rearrangement (1).

1. Martin A, Baker TA, Sauer RT (2005) Rebuilt AAA + motors reveal operating principles for ATP-fuelled machines. *Nature* 437:1115–1120.

[Movie S1 \(AVI\)](#)
